# Supplementary material
Source: bioRxiv or medRxiv preprint supplement (http://medrxiv.stage.highwire.org/highwire/filestream/91892/field_highwire_adjunct_files/7/2020.07.31.20165654-3.pdf)
Supplement: Supplementary file [file 2020.07.31.20165654-3.pdf]

**Supplemental Table 3.** Stay at home orders put in place at the state level in the United States.

| US State                | Intensity <sup>1</sup> | State Date<br>(2020) <sup>2</sup> | End Date<br>(2020) <sup>2</sup> | Duration<br>(Days) <sup>3</sup> | Cases at Start <sup>4</sup> |
|-------------------------|------------------------|-----------------------------------|---------------------------------|---------------------------------|-----------------------------|
| Alabama                 | 0                      | April 4 <sup>th</sup>             | April 30 <sup>th</sup>          | 27                              | 1,495                       |
| Alaska                  | 1                      | March 28 <sup>th</sup>            | April 21 <sup>st</sup>          | 25                              | 58                          |
| Arizona                 | 1                      | March 31 <sup>st</sup>            | May 15 <sup>th</sup>            | 46                              | 1,157                       |
| Arkansas <sup>5</sup>   | -                      | -                                 | -                               | -                               | -                           |
| California              | 1                      | March 19 <sup>th</sup>            | May 7 <sup>th</sup>             | 50                              | 828                         |
| Colorado                | 1                      | March 26 <sup>th</sup>            | April 26 <sup>th</sup>          | 32                              | 1,069                       |
| Connecticut             | 0                      | March 23 <sup>rd</sup>            | May 20 <sup>th</sup>            | 59                              | 327                         |
| Delaware                | 1                      | March 24 <sup>th</sup>            | May 31 <sup>st</sup>            | 69                              | 68                          |
| District of<br>Columbia | 1                      | April 1 <sup>st</sup>             | June 8 <sup>th</sup>            | 69                              | 495                         |
| Florida                 | 1                      | April 3 <sup>rd</sup>             | April 29 <sup>th</sup>          | 27                              | 8,999                       |
| Georgia                 | 1                      | April 3 <sup>rd</sup>             | April 30 <sup>th</sup>          | 28                              | 4,570                       |
| Hawaii                  | 1                      | March 25 <sup>th</sup>            | May 31 <sup>st</sup>            | 68                              | 70                          |
| Idaho                   | 1                      | March 25 <sup>th</sup>            | April 30 <sup>th</sup>          | 37                              | 81                          |
| Illinois                | 1                      | March 21 <sup>st</sup>            | May 31 <sup>st</sup>            | 72                              | 418                         |
| Indiana                 | 1                      | March 24 <sup>th</sup>            | May 4 <sup>th</sup>             | 42                              | 214                         |
| Iowa <sup>5</sup>       | -                      | -                                 | -                               | -                               | -                           |
| Kansas                  | 1                      | March 30 <sup>th</sup>            | May 3 <sup>rd</sup>             | 35                              | 330                         |
| Kentucky                | 0                      | March 26 <sup>th</sup>            | May 10 <sup>th</sup>            | 46                              | 143                         |
| Louisiana               | 1                      | March 23 <sup>rd</sup>            | May 15 <sup>th</sup>            | 54                              | 787                         |
| Maine                   | 1                      | April 2 <sup>nd</sup>             | May 31 <sup>st</sup>            | 60                              | 297                         |
| Maryland                | 1                      | March 30 <sup>th</sup>            | May 15 <sup>th</sup>            | 47                              | 1,239                       |
| Massachusetts           | 0                      | March 24 <sup>th</sup>            | May 18 <sup>th</sup>            | 56                              | 723                         |

| US State                  | Intensity <sup>1</sup> | State Date<br>(2020) <sup>2</sup> | End Date<br>(2020) <sup>2</sup> | Duration<br>(Days) <sup>3</sup> | Cases at Start <sup>4</sup> |
|---------------------------|------------------------|-----------------------------------|---------------------------------|---------------------------------|-----------------------------|
| Michigan                  | 1                      | March 24 <sup>th</sup>            | May 28 <sup>th</sup>            | 66                              | 1,450                       |
| Minnesota                 | 1                      | March 27 <sup>th</sup>            | May 17 <sup>th</sup>            | 52                              | 344                         |
| Mississippi               | 1                      | April 3 <sup>rd</sup>             | April 27 <sup>th</sup>          | 25                              | 1,177                       |
| Missouri                  | 1                      | April 6 <sup>th</sup>             | May 3 <sup>rd</sup>             | 28                              | 2,393                       |
| Montana                   | 1                      | March 28 <sup>th</sup>            | April 26 <sup>th</sup>          | 30                              | 109                         |
| Nebraska <sup>5</sup>     | -                      | -                                 | -                               | -                               | -                           |
| Nevada                    | 1                      | April 1 <sup>st</sup>             | May 15 <sup>th</sup>            | 45                              | 1,012                       |
| New Hampshire             | 1                      | March 27 <sup>th</sup>            | June 15 <sup>th</sup>           | 71                              | 137                         |
| New Jersey                | 1                      | March 21 <sup>st</sup>            | June 9 <sup>th</sup>            | 81                              | 798                         |
| New Mexico                | 0                      | March 24 <sup>th</sup>            | May 31 <sup>st</sup>            | 69                              | 83                          |
| New York                  | 1                      | March 22 <sup>nd</sup>            | May 28 <sup>th</sup>            | 68                              | 11,727                      |
| North Carolina            | 1                      | March 30 <sup>th</sup>            | May 8 <sup>th</sup>             | 40                              | 1,191                       |
| North Dakota <sup>5</sup> | -                      | -                                 | -                               | -                               | -                           |
| Ohio                      | 1                      | March 23 <sup>rd</sup>            | May 29 <sup>th</sup>            | 68                              | 356                         |
| Oklahoma                  | 1                      | March 24 <sup>th</sup>            | May 24 <sup>th</sup>            | 62                              | 81                          |
| Oregon                    | 1                      | March 23 <sup>rd</sup>            | May 15 <sup>th</sup>            | 54                              | 161                         |
| Pennsylvania              | 1                      | March 30 <sup>th</sup>            | June 4 <sup>th</sup>            | 67                              | 3,432                       |
| Rhode Island              | 1                      | March 28 <sup>th</sup>            | May 8 <sup>th</sup>             | 42                              | 132                         |
| South Carolina            | 1                      | April 6 <sup>th</sup>             | May 4 <sup>th</sup>             | 29                              | 2,049                       |
| South Dakota <sup>5</sup> | -                      | -                                 | -                               | -                               | -                           |
| Tennessee                 | 1                      | March 31 <sup>st</sup>            | April 30 <sup>th</sup>          | 31                              | 1,570                       |
| Texas                     | 1                      | April 2 <sup>nd</sup>             | April 30 <sup>th</sup>          | 29                              | 4,355                       |
| Utah                      | 0                      | March 27 <sup>th</sup>            | May 1 <sup>st</sup>             | 36                              | 368                         |
| Vermont                   | 1                      | March 25 <sup>th</sup>            | May 15 <sup>th</sup>            | 52                              | 95                          |

| US State             | Intensity <sup>1</sup> | State Date (2020) <sup>2</sup> | End Date (2020) <sup>2</sup> | Duration (Days) <sup>3</sup> | Cases at Start <sup>4</sup> |
|----------------------|------------------------|--------------------------------|------------------------------|------------------------------|-----------------------------|
| Virginia             | 1                      | March 30 <sup>th</sup>         | June 10 <sup>th</sup>        | 73                           | 890                         |
| Washington           | 1                      | March 23 <sup>rd</sup>         | May 31 <sup>st</sup>         | 70                           | 1,833                       |
| West Virginia        | 1                      | March 24 <sup>th</sup>         | May 3 <sup>rd</sup>          | 41                           | 16                          |
| Wisconsin            | 1                      | March 25 <sup>th</sup>         | May 13 <sup>th</sup>         | 50                           | 480                         |
| Wyoming <sup>5</sup> | -                      | -                              | -                            | -                            | -                           |

<sup>1</sup>The intensity at which this intervention was implemented by the state is denoted by (1) Mandate or (0) Recommendation (NYC, 2020).

<sup>2</sup>Start and end dates of intervention implementation (NYC, 2020).

<sup>3</sup>The number of days the intervention was implemented from start to end dates.

<sup>4</sup>The cumulative number of cases in the respective state at the time the intervention was implemented.

<sup>5</sup>Six states, Arkansas, Iowa, Nebraska, North Dakota, South Dakota, and Wyoming, did not implement Stay at home orders.

## References

NYC (2020). *COVID-19: Data* [Online]. New York City Health. Available: <https://www1.nyc.gov/site/doh/covid/covid-19-data-archive.page> [Accessed July 20, 2020].
